# Supplementary material for: Negative reciprocal regulation between Sirt1 and Per2 modulates the circadian clock and aging
Source: PubMed Central journal article supplement (PMC4922021; doi:10.1038/srep28633), 2016-06-27
Supplement: srep28633-s1.pdf [file srep28633-s1.pdf]

**Negative reciprocal regulation between Sirt1 and Per2 modulates the circadian clock and aging**

Rui-Hong Wang<sup>1,2</sup>, Tingrui Zhao<sup>2</sup>, Kairong Cui<sup>3</sup>, Gangqing Hu<sup>3</sup>, Qiang Chen<sup>1</sup>, Weiping Chen<sup>4</sup>, Xin-Wei Wang<sup>5</sup>, Alejandro Soto-Gutierrez<sup>6</sup>, Keji Zhao<sup>3</sup>, and Chu-Xia Deng<sup>1,2\*</sup>

<sup>1</sup>Faculty of Health Sciences, University of Macau, Macau SAR, China, <sup>2</sup>Genetics of Development and Disease Branch, National Institute of Diabetes and Digestive and Kidney Diseases, National Institutes of Health, Bethesda, MD 20892, USA, <sup>3</sup>Systems Biology Center, National Heart, Lung, and Blood Institute, <sup>4</sup>Genomic Core Laboratory, National Institute of Diabetes and Digestive and Kidney Diseases, <sup>5</sup>Laboratory of Human Carcinogenesis, Center for Cancer Research, National Cancer Institute, National Institutes of Health, Bethesda, MD 20892, USA, <sup>6</sup>Department of Pathology, University of Pittsburgh, Pittsburgh, PA 15213, USA

\*Corresponding Author

Phone: 8822 4997

Fax: 8822 2314

Email: cxdeng@umac.mo

Running title: Negative reciprocal regulation between Sirt1 and Per2

Key words: Sirt1, Per2, Liver, Aging, and Circadian

## **Supplementary Methods**

**Wound healing assay.** Six-month-old mice were anesthetized with Avertin. The dorsum shaved and cleaned with alcohol. Two equidistant 1-cm full-thickness incisional wounds were made through the skin and panniculus carnosus muscle. Wounds were photographed at days 5 and 7 post-wounding.

**Peripheral blood chemistry analysis.** Peripheral blood of mice was collected into EDTA-coated tubes. Blood samples were sent to NIH clinical service for counting the different types of blood cells present in the samples.

**$\beta$ -galactosidase activity assay.** Tissues were embedded in OCT compound, and 10  $\mu$ m cryosections were prepared and fixed with 1% formalin. Mouse embryonic fibroblasts (MEFs) were fixed with 0.5% glutaraldehyde for 5 min at room temperature. Slides were then incubated at 37°C overnight with a solution containing K<sub>3</sub>[Fe(CN)<sub>6</sub>]·3H<sub>2</sub>O and K<sub>4</sub>[Fe(CN)<sub>6</sub>]. Afterwards, the slides were counterstained with FastRed.

**Immunofluorescent staining.** Paraffin-embedded tissues were sectioned with a Microm HE340E to 5  $\mu$ m. The sections were cooked in Reveal Decloaker (Biocare Medical) to reduce background staining, stained with antibody against  $\gamma$ -H2AX (Millipore).

**Human hepatocyte isolation and culture.** Human tissues were collected with informed consent following ethical and Institutional guidelines through the Liver Tissue Cell Distribution System (University of Pittsburgh, Pittsburgh, PA), which is funded by NIH Contract #

HSN276201200017C. Human hepatocytes were isolated from specimens derived from patients undergoing scheduled liver resection. Residual tissues not needed for diagnostic purposes after hepatic resection were transported to the laboratory from the operating room in cold Eagle's Minimum Essential Medium (Lonza, Walkersville, MD) within 90 min of removal. Briefly, the major hepatic vessels were cannulated and sutured on the cut surface of the parenchyma. A 3-step perfusion by peristaltic pump was conducted, followed by mechanical tissue disruption with sterile scissors and filtration through stainless-steel mesh and/or gauze to produce a cellular suspension. Hepatocytes were enriched and digestive enzymes were removed by 3 sequential low-speed centrifugations (85–90 x g). Only suspensions with more than 85% cell viability were used for experiments. Cell suspensions (1 ml;  $1 \times 10^6$  viable hepatocytes/ml) were plated in collagen-treated 6-well plates with supplemented Hepatocyte Maintenance Medium (Lonza). After overnight culture at 37°C and 5% CO<sub>2</sub>, plated hepatocytes were used for experiments.

**Western blot.** Western blot analysis was performed with Licor (Lincoln, NE), utilizing antibodies against SIRT1 (Cell Signaling Technology, Cat. No. 2428), Per2 (Santa Cruz Biotechnology, Cat. No. sc-7727), Per2 (Santa Cruz Biotechnology, Cat. No. sc-25363) and Per2 (Abcam, Cat. No. ab179813), Clock (Santa Cruz Biotechnology, Cat. No. sc-6927), Bmal1 (Santa Cruz Biotechnology, Cat. No. sc-8550), Myc-tag (Santa Cruz Biotechnology, Cat. No. sc-40), p53 (Santa Cruz Biotechnology, Cat. No. sc-100), p16 (Santa Cruz Biotechnology, Cat. No. sc-1207), p21 (Santa Cruz Biotechnology, Cat. No. sc-471),  $\beta$ -actin (Sigma, Cat. No. A-5316), Nampt (Novus, Cat. No. NB100-594), histone H3 (Santa Cruz Biotechnology, Cat. No. sc-8654), histone H4 (Santa Cruz Biotechnology, Cat. No. sc-10810), histone H4K16ac (Santa Cruz Biotechnology, Cat. No. sc-8662-R), and histone H3K9ac (Millipore, Cat. No. 06-599). Staining

with actin was used as a loading control.

## Primers.

### ChIP primers

| Name               | Forward 5'-3'         | Reverse 5'-3'         |
|--------------------|-----------------------|-----------------------|
| mPer2<br>+500      | AGTGGTCCTTCCCCCAGGGC  | CGCCGACTCCCATGGTGCTG  |
| mPer2 -500         | GGCCCCTCTGGATCTGCTGC  | AATGACGGTCAGCCTGGGGG  |
| mPer2<br>9194-9431 | CTGGACCCATCCTAGGAACA  | GACCCTTTTCCAGGTTCAACA |
| mPer2<br>8792-9029 | TTACAGAAACCCTGGCAACC  | CATCCTCCACGCCAGTATTT  |
| mUsp2<br>3900-4150 | TCTGAATCCCCGAGATGTTC  | GGGATTAAGAGGCCAAGAGC  |
| mUsp2<br>4850-5050 | CCTGGCCCTCTTAAGTTGTG  | TCTTTCCCAAAGGGACAGTG  |
| mSirt1 3-<br>180   | TCTTCCAACCTGCCTCTCTGG | GTGACCCGGCGTGTTGTG    |

### qRT-PCR primers

| Name     | Forward 5'-3'         | Reverse 5'-3'         |
|----------|-----------------------|-----------------------|
| mPer2    | AACAAATCCACCGGCTACTG  | CTCCGGTGAGACTCCTCTTG  |
| mKcnk5   | ACCATCGGTTATGGCAATGT  | TGGTAAGAACTGGCCCAAC   |
| mC2cd2l  | GACAACCGTGCTGAGTGAGA  | TCCTCTTGGTGGGTGTCTTC  |
| mTle2    | GCAGCTCTGTCGTGTATGGA  | TGTGCCTACCAGAGCATCAG  |
| mNapb    | CGAGGAAATGTTTCCAGCAT  | CCCTTGGATGGACTTCTTGA  |
| mGermin  | TGACCAATCTTGGCACACAT  | AGGATTCGTCAGGCAGCTTA  |
| mCrtc1   | GCTGGAGCAGTTCAACATGA  | CTGTCACCGTGAGGATGATG  |
| mUsp2    | GAACCAGCAAGCTCACAACA  | CATTGAAAGTGTGCCATTCG  |
| mTspan6  | AAATGAGAAGGCCACCAATG  | TCGCGTACAGTTTCAGCATC  |
| mCyp7b1  | CCTGCAGTCAACAGGTCAA   | TGCTGGAGTATGAGCACAGC  |
| mPcmd2   | CTTCATCAGAACCAGCGACA  | ATGACAAGGATGCCTCCAAC  |
| mCreb3l2 | AAGGTCTCTCGAACCTGCAA  | TTGGTGGCAGAAGGATAAGG  |
| mPer1    | TGAAGCAAGACCGGGAGA    | CACACACGCCATCACATCAA  |
| mCry1    | CTGAAGCAAAAATCGCCACCT | CACTGGTTCCGAAAGGGACTC |
| mCry2    | TGGGCATCAACCGATGGA    | CCCATTCTTGACAGCCTTG   |
| mp16     | CCGCTGCAGACAGACTGG    | TGAGCAGAAGAGCTGCTACG  |
| mp19     | GCTCTGGCTTTCGTGAACAT  | CGAATCTGCACCGTAGTTGA  |

qRT-PCR primers for human

|          | Forward 5'-3'        | Reverse 5'-3'        |
|----------|----------------------|----------------------|
| hPER2-1  | CTGGCCATCCACAAAAAGAT | CCTCCCAATGATGAAGGAGA |
| hSIRT1-1 | GCAGATTAGTAGGCGGCTTG | TCTGGCATGTCCCACTATCA |

## Supplementary Figure Legend

**Supplementary Figure 1** Deletion of *Sirt1* leads to premature aging. (A) Appearance of 12-month-old WT and MT mice. (B) Mean body weight ( $\pm$ SD) of WT and MT mice at different ages. (C) Mean number of granulocytes ( $\pm$ SD, 1000/ $\mu$ l) in peripheral blood analysis of WT and MT mice at different ages. For (B) and (C), all the experiments above, 3–5 mice per genotype were analyzed. \*  $p < 0.05$ . (D) Wound healing analyzed in WT and MT mice at 6 months of age. (E)  $\beta$ -galactosidase activity in tissue sections prepared from the kidney and brain of WT and MT mice at 6 months of age. (F)  $\gamma$ H2AX foci formation in tissue sections prepared from the intestine and liver of WT and MT mice at 6 months of age. For panels D, E, and F, the results presented are representative of the animals analyzed in those experiments. (G) NAD<sup>+</sup> level in wildtype (WT) and mutant (MT) mice at 3 months of age. (H) Quantification of western blot in figure 1F. (I) Quantification of western blot in figure 1G.

**Supplementary Figure 2** Distribution of ChIP-Seq read densities of H4K16ac across the promoter regions of (A) *Per2* and (B) *Usp2*. Highlighted are genomic regions that show an increase in H4K16ac read in MT mice when compared with WT mice. For each panel, the input and ChIP data are presented, the unit for the y-axis is RPBM (Read Per Base pair per Million reads). Primer location is also indicated in panel A and B.

**Supplementary Figure 3** *Per2* and *Sirt1* constitute a reciprocal negative regulation loop. (A) Western blot analysis of *Per2* and *Sirt1* protein expression in 3-month-old WT mouse liver obtained by circadian liver sample collection. Data are representative results from 3 mice. (B)

qRT-PCR analysis of *Sirt1* and *Per2* expression in 3-month-old WT mouse liver obtained by circadian liver sample collection. Data represent the mean ( $\pm$ SD, n=3) at each time point. The level of gene expression at ZT0 was set at 1. (C) Deletion analysis of *Sirt1* promoter activity using luciferase reporter activity assays in MEFs. Insert shows the E-box location within different lengths of the *Sirt1* promoter. (D) Effect of *Per2* expression on *Sirt1* promoter activity using luciferase reporter activity assays in MEFs. \* $p$ <0.05. Insert shows *Per2* expression level. For C–D, 3 individual primary WT MEF cell lines were utilized; experiments were repeated twice in each line. Data represent the mean ( $\pm$ SD) for these experiments from one cell line. Luciferase activity level from GFP transfected samples was set as 1. (E) *SIRT1* promoter luciferase reporter activity of 202-Luc construct following ectopic expression of *Bmal1* (B), *Clock* (C), and *Per2* (P) in human HepG2 cells. Data represent the mean ( $\pm$ SD, n=3). (F) Biotin-labeled E-box sequences showing a possible Clock/Bmal1 binding site (100-116). (G) Biotin pull-down assays examining Bmal1/Clock/Per2 binding to the *Sirt1* promoter at E-box (100-116) region. The data are representative of experiments performed 3 times with independently prepared 293/HEK nuclear protein extracts. Mut, core domain mutated as shown in panel (F).

**Supplementary Figure 4** Gene expression oscillation upon *Sirt1* deletion. (A) ChIP analysis of the binding of Bmal1, Clock, and Per2 to the *Sirt1* promoter upon serum shock and release in MEF cells. Inset legend indicates time interval after cells were returned to normal culture conditions 12 hours after serum shock. Three independent primary WT MEF cell lines were utilized. Data represent the mean ( $\pm$ SD) of 3 experiments using one cell line. \*  $p$ <0.05. Each ChIP data was normalized with its own input, and then normalized again with IgG ChIP. Afterwards, ChIP value at 0h was set at 1. (B) qRT-PCR analysis of *Sirt1* expression in MEF

cells following serum shock. Three independent primary WT MEF cell lines were utilized. Data represent the mean ( $\pm$ SD) of 3 experiments using one cell line. Number of hours post-shock represents the time interval after cells were returned to normal culture conditions after serum shock. (C) qRT-PCR analysis of circadian-clock gene expression in MEF cells 16 h after cells were returned to normal culture conditions from serum shock. Three pairs of independent primary WT and MT MEF cell lines were utilized. Data represent the mean  $\pm$  SD for one cell line. \*  $p < 0.05$ . Expression value at 12h in WT cells was set at 1. (D) qRT-PCR analysis of *SIRT1* and *PER2* expression in hTERT-immortalized human primary hepatocytes (HHT-4) subjected to shRNA knockdown of *SIRT1* (shT1) or *PER2* (shP) or overexpression of *SIRT1* (oxT1) or *PER2* (oxP). The level of expression for mock-transfected cells was set at 1. Experiments were repeated in HHT-4 cells for 3 times in triplicates. Data represent the mean ( $\pm$ SD) of one experiment. \*  $p < 0.05$ ; \*\*  $p < 0.01$ . Comparison was made between specific transfected sample vs GFP transfected sample. (E) ChIP of H4K16Ac on Per2 promoter 9194-9431 after SIRT1 overexpression in wildtype MEF cells. (F) ChIP of H4K16Ac on Per2 promoter 9194-9431 after SIRT1 knockdown in wildtype MEF cells. (G) qRT-PCR analysis of *Cry1* expression in the livers of 3-month-old WT or SIRT1LKO (MT) mice obtained by circadian liver sample collection. Data represent the mean ( $\pm$ SD, n=3). The level of gene expression for WT mice at ZT0 was set at 1. (H) qRT-PCR analysis of gene expression at ZT4 in the livers of 3-month-old WT or SIRT1LKO (LKO) mice obtained by circadian liver sample collection. Data represent the mean ( $\pm$ SD, n=3). \* $p < 0.05$ .

**Supplementary Figure 5** Hepatic gene expression oscillation upon *Per2* overexpression or knockdown in mice. Mice at 3 months of age were used for the experiments. (A) qRT-PCR



analysis of hepatic *Per2* expression in WT mice after infected with virus for Flag-Per2, GFP, or shPer2. Data represent the mean ( $\pm$ SD, n=3). The level of gene expression for GFP lentivirus-infected mice was set as 1. \* $p < 0.05$  represents the comparison between specific virus infected vs GFP virus infected. (B–C) qRT-PCR analysis of G6pase (B) and p19 (C) expression upon Per2 virus infection. The level of gene expression for GFP lentivirus-infected mice at ZT0 was set as 1. Data represent the mean ( $\pm$ SD, n=3). \* $p < 0.05$  when comparison was made between GFP cohort and Per2 overexpressed cohort. (D) Western blot and qRT-PCR validation of hepatic *Sirt1* and *Per2* expression in SIRT1LKO mice after infected with retrovirus for shLuc or shPer2. Data in lower panel represent the mean ( $\pm$ SD, n=3). The comparison was made against WT. The expression value from WT was set as 1. \* $p < 0.05$ . (E–F) qRT-PCR analysis of G6pase (E) and p19 (F) expression from livers post lentivirus infection. WT, wild-type; LKO/shLuc, SIRT1LKO mice infected with shLuciferase lentivirus; LKO/shPer2, SIRT1LKO mice infected with shPer2 lentivirus. The level of gene expression of the WT mice at ZT0 was set as 1. Data represent the mean ( $\pm$ SD, n=3). \* $p < 0.05$  represents the comparison between LKO/shLuciferase and LKO/shPer2.

**Supplementary Figure 6** Hepatic HIF-1 $\alpha$  and its downstream signaling genes in WT and MT mice. (A) The total hepatic intracellular HIF-1 $\alpha$  level was determined by Western blot. Upper panel compares protein expression in livers obtained during circadian liver sample collection from 3-month-old WT mice. MEF cell samples treated with or without DFX (DFX and C, respectively) were run on the same gel (with one well left empty between the MEF and liver samples) and served as a positive control. Middle panel compares liver HIF-1 $\alpha$  expression in 3-month-old WT and MT mice. Lower panel compares liver HIF-1 $\alpha$  expression in 3-month-old and 22-month-old WT mice. (B) Gene-expression levels of HIF-1 $\alpha$  downstream genes in 3-

month-old WT, 3-month-old MT, 12-month-old WT, and 19-month-old WT mice, obtained by microarray analysis.

Supplementary Figure 1

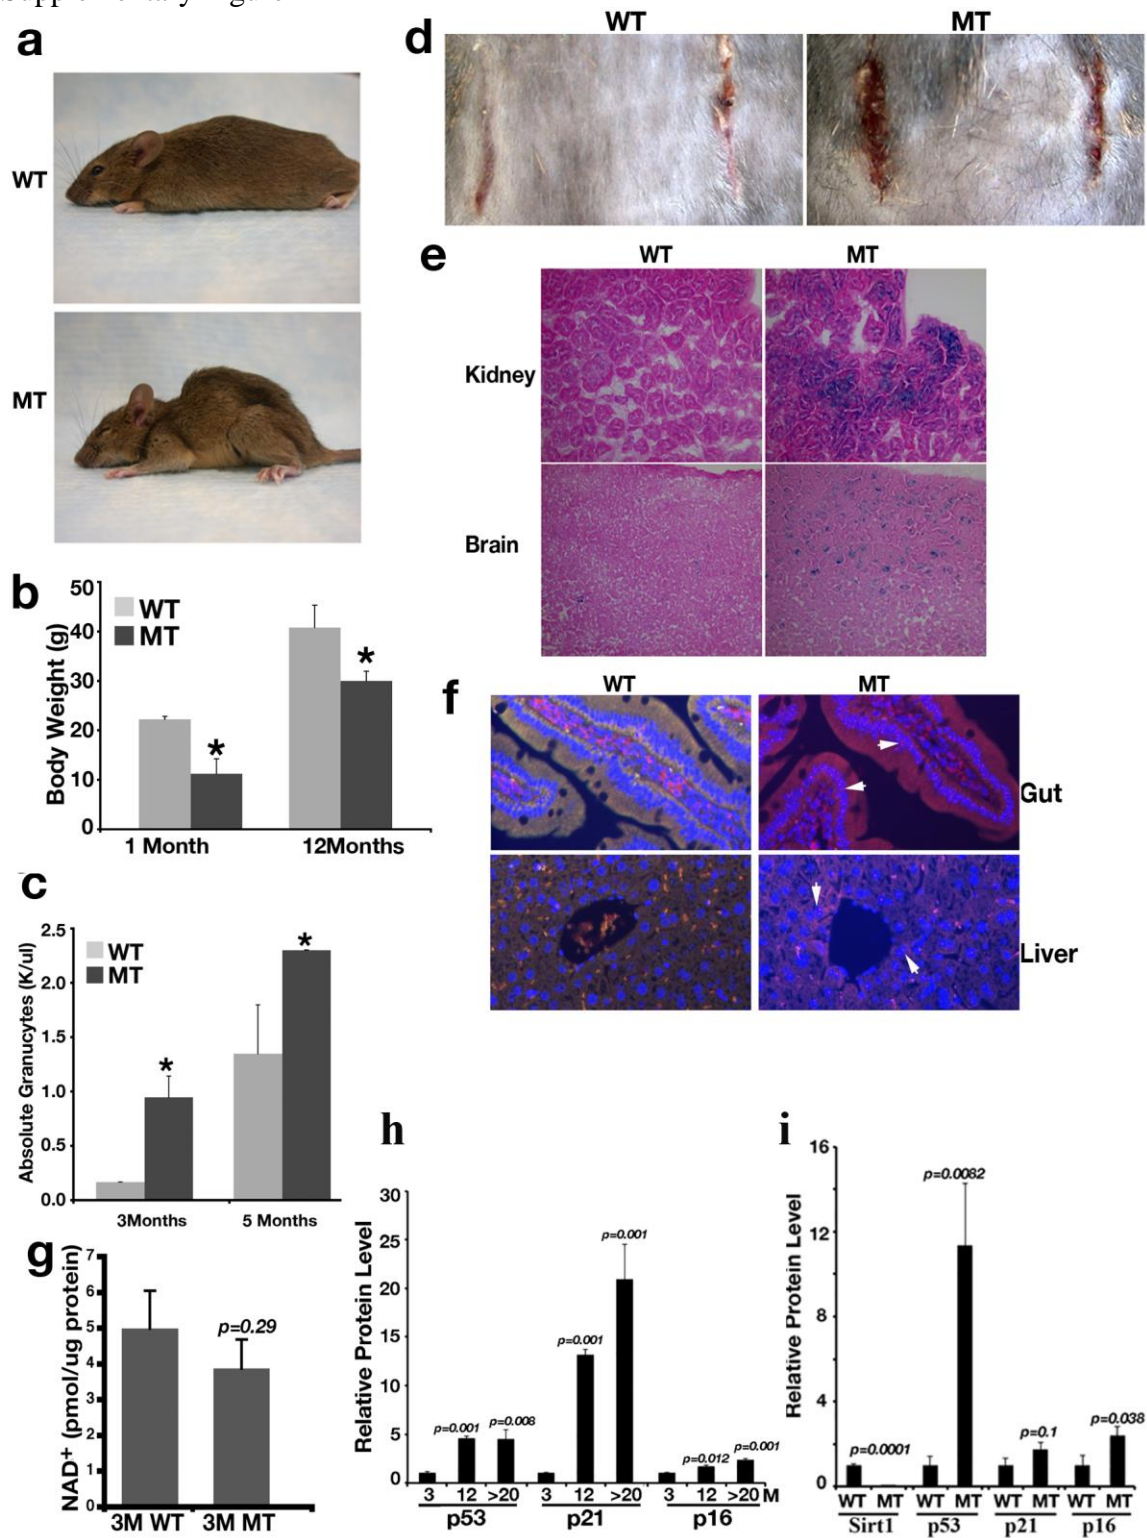

Supplementary Figure 2

**a**

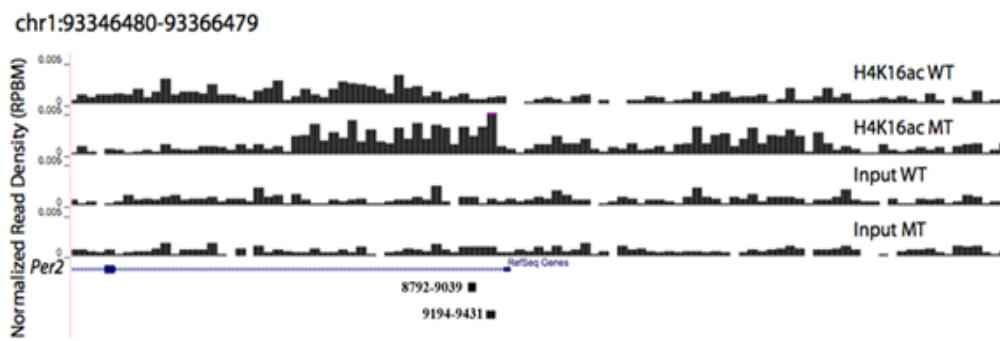

**b**

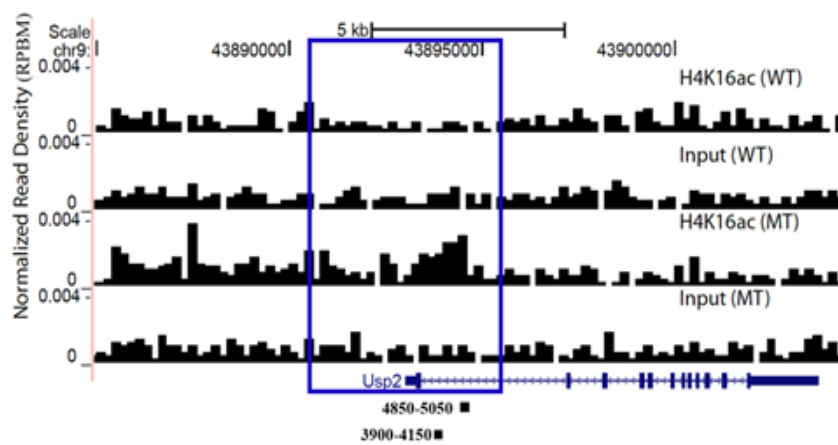

Supplementary Figure 3

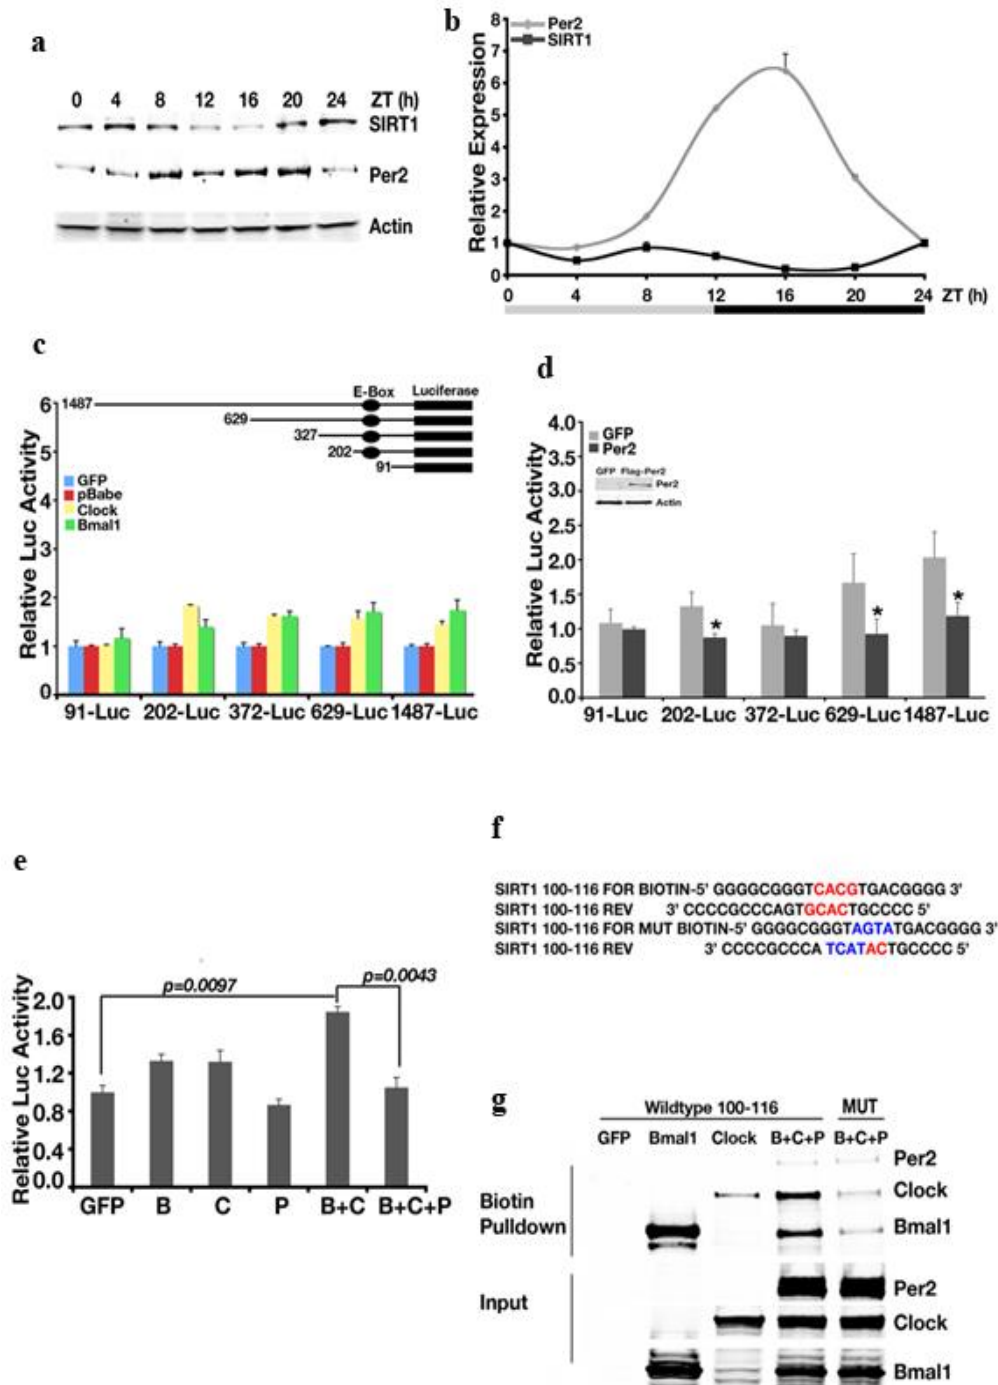

Supplementary Figure 4

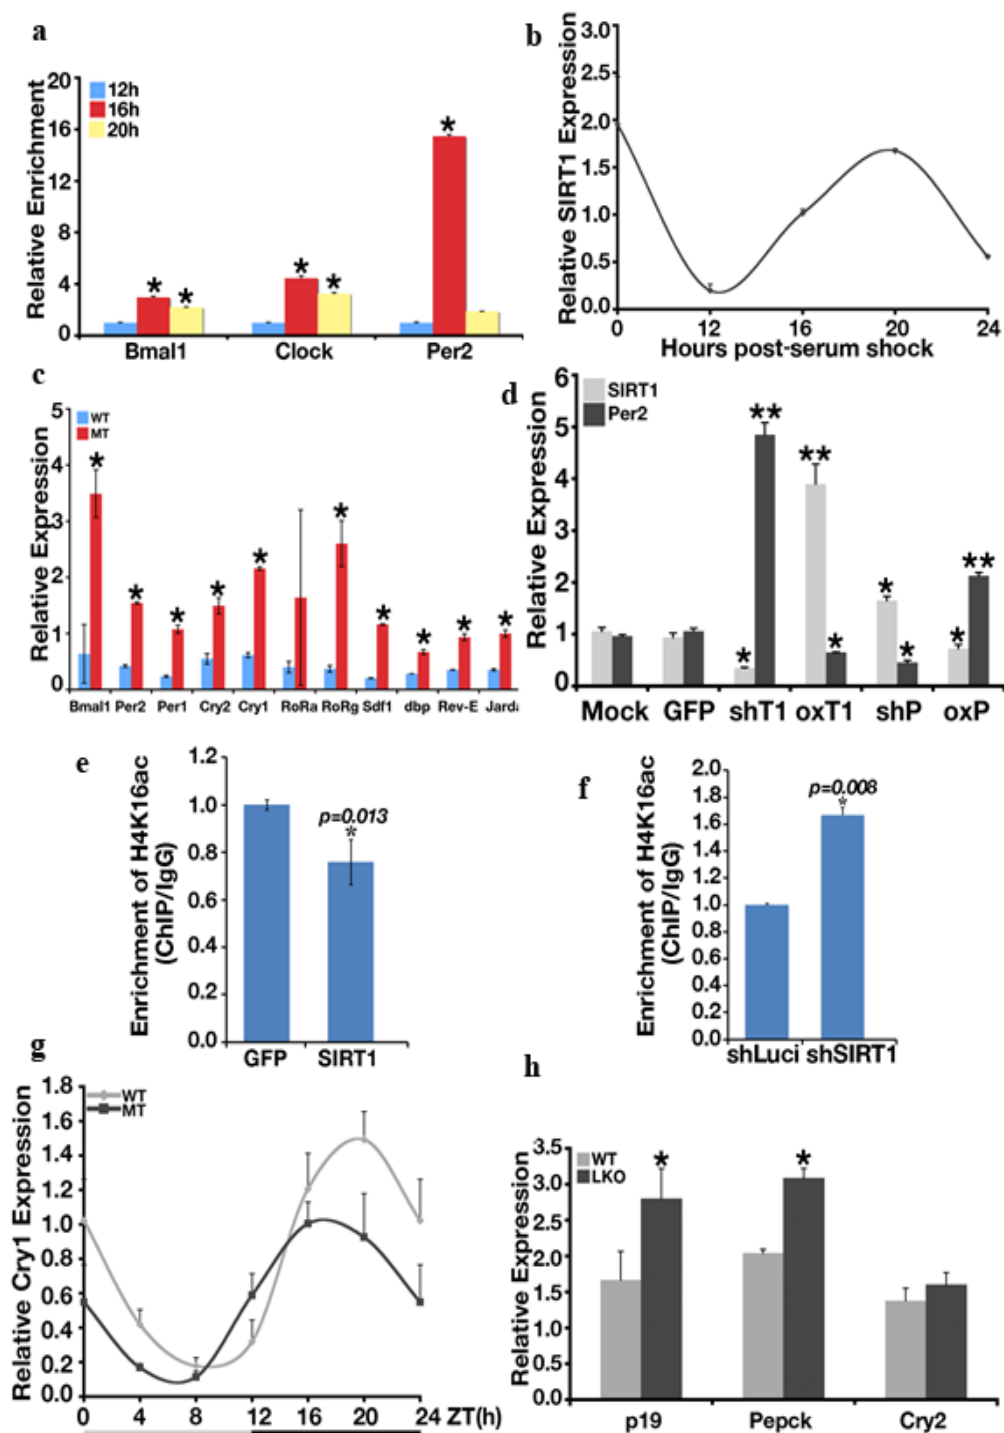

Supplementary Figure 5

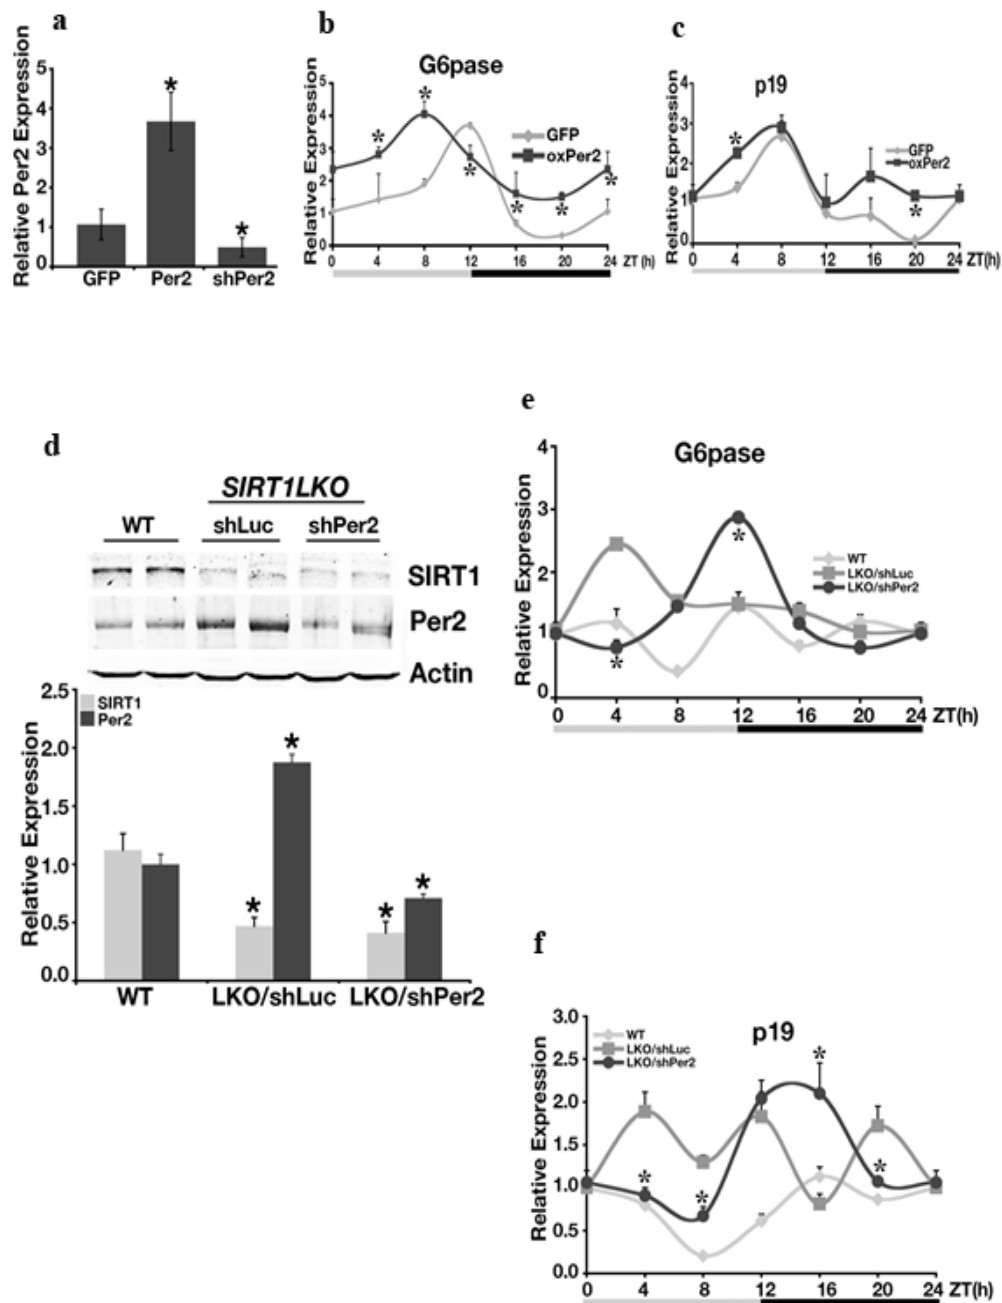

Supplementary Figure 6

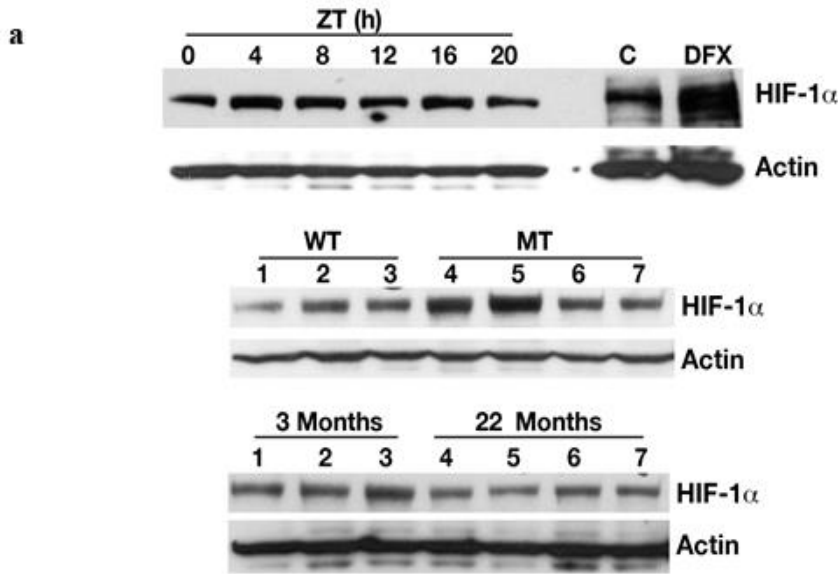

**b** **Microarray data for HIF1alpha downstream genes**

| Gene Symbol         | 3Mon WT     | 3Mon MT     | 12Mon WT   | 19Mon WT   |
|---------------------|-------------|-------------|------------|------------|
| Tfrc                | 6.07827365  | 6.66331555  | 5.793774   | 6.0429803  |
| Fgf2                | 3.41478345  | 3.10976355  | 3.7409062  | 2.82965255 |
| Igf1bp3             | 10.434397   | 10.4841535  | 10.174875  | 10.04182   |
| Igf2                | 5.197262    | 5.2802195   | 2.7804895  | 3.87094115 |
| Kcnip3              | 4.06110335  | 4.027688    | 3.71244785 | 3.9268466  |
| Tgfb3               | 5.15953835  | 5.340373    | 3.7439785  | 3.3212815  |
| Cited2              | 10.8288645  | 9.77016975  | 10.3159685 | 10.471377  |
| Ak3                 | 9.672012    | 9.767706    | 9.7963305  | 9.7237175  |
| Pgk1                | 13.4366285  | 13.32929825 | 13.359876  | 13.214354  |
| Car9                | 6.81532475  | 4.48544695  | 6.5484328  | 6.0749755  |
| Ldha                | 14.193981   | 14.29840425 | 14.1220035 | 14.2511475 |
| Tfrc                | 9.1246885   | 9.5870655   | 9.310064   | 9.1717825  |
| Flt1                | 7.29981325  | 7.50029515  | 6.4698331  | 6.6624054  |
| Myt1                | 5.0233841   | 3.09713375  | 2.3053674  | 4.2357894  |
| EG103324 /// EG4331 | 3.83860305  | 5.1518984   | 5.2798841  | 2.37890495 |
| BC004004            | 9.3138895   | 8.8603935   | 9.493732   | 9.3332325  |
| Hk2                 | 6.8682645   | 6.99430535  | 7.1395262  | 7.30154535 |
| Svs5                | 3.98514855  | 5.4605255   | 3.9001984  | 4.36775535 |
| P4ha1               | 6.4211515   | 6.3704865   | 5.3740885  | 6.40960185 |
| Nos2                | 2.12147295  | 2.18984185  | 1.97021675 | 2.10788355 |
| Slc2a13             | 4.60239875  | 5.7345818   | 5.539965   | 6.112009   |
| Slc2a2              | 14.3809415  | 14.52582    | 14.5439155 | 14.4382525 |
| Slc2a3              | 6.2580375   | 5.94653155  | 5.41352885 | 5.88831995 |
| Adra1b              | 7.616791    | 7.5114951   | 7.60592675 | 8.13463535 |
| Adra1b              | 7.616791    | 7.5114951   | 7.60592675 | 8.13463535 |
| Cadm1               | 9.9401565   | 10.1842175  | 9.494387   | 9.982355   |
| p21                 | 7.1402335   | 8.020135    | 7.52597975 | 7.437424   |
| IGFBP1              | 13.887189   | 12.53709    | 12.736018  | 12.2427405 |
| IGFBP2              | 14.30519525 | 13.8698845  | 12.261749  | 13.318667  |
| VEGFb               | 7.74987135  | 7.87389275  | 8.0257837  | 8.5323455  |
| PDK1                | 10.200607   | 9.952988    | 11.189682  | 9.467443   |
| Gapdh               | 7.07766065  | 7.30191515  | 7.13793115 | 6.8228829  |



**Supplementary Table 1**

Up-regulated Aging Related Gene List in Log2 scale

| <b>Probe Set ID</b> | <b>FoldChange</b> | <b>Gene Symbol</b> | <b>RefSeq Transcript ID</b> |
|---------------------|-------------------|--------------------|-----------------------------|
| 1421653_a_at        | 3.33854875        | Igh /// Igh-2      |                             |
| 1417602_at          | 1.991362          | Per2               | NM_011066                   |
| 1430382_at          | 1.6320655         | 4833413G10Rik      |                             |
| 1451727_at          | 1.5806064         | Slu7               | NM_148673                   |
| 1452073_at          | 1.4374072         | 6720460F02Rik      | NM_144526                   |
| 1417168_a_at        | 1.32626985        | Usp2               | NM_016808                   |
| 1448945_at          | 1.28753525        | Pllp               | NM_026385                   |
| 1427081_at          | 1.210118          | A630072M18Rik      |                             |
| 1433383_at          | 1.11101025        | 1500002K03Rik      |                             |
| 1433622_at          | 1.02336125        | Gemin4             | NM_177367                   |
| 1447724_x_at        | 0.9974115         | Opa3               | NM_207525                   |
| 1452154_at          | 0.99717           | Iars               | NM_172015                   |
| 1424081_at          | 0.9900115         | Pcgf6              | NM_027654                   |
| 1421852_at          | 0.9851945         | Kcnk5              | NM_021542                   |
| 1417904_at          | 0.926253          | Dclre1a            | NM_018831                   |
| 1426532_at          | 0.9108435         | Zmynd11            | NM_144516                   |
| 1427665_a_at        | 0.90785985        | Nfic               | NM_008688                   |
| 1425019_at          | 0.90429525        | Ubxn2a             | NM_145441                   |
| 1428543_at          | 0.89815805        | Ppat               | XM_001002879                |
| 1425060_s_at        | 0.8851545         | Clip1              | NM_019765                   |
| 1425348_a_at        | 0.87796195        | Srprb              | NM_009275                   |
| 1428788_at          | 0.8387275         | Pgp                | NM_025954                   |
| 1416773_at          | 0.8262362         | Wee1               | NM_009516                   |
| 1426607_at          | 0.82495475        | EG633640           | NM_001039244                |
| 1423795_at          | 0.816878          | Sfpq               | NM_023603                   |
| 1417750_a_at        | 0.8008645         | Slc25a37           | NM_026331                   |
| 1418133_at          | 0.7956235         | Bcl3               | NM_033601                   |
| 1419751_x_at        | 0.771343          | AB056442           | XM_922697                   |
| 1422767_at          | 0.76625675        | Bysl               | NM_016859                   |
| 1452831_s_at        | 0.7409805         | Ppat               | XM_001002879                |
| 1448484_at          | 0.7218165         | Amd1               | NM_009665                   |
| 1434149_at          | 0.7117385         | Tcf4               | NM_001083967                |
| 1422624_at          | 0.694453          | Rev1               | NM_019570                   |
| 1428095_a_at        | 0.658932          | C2cd21             | NM_027909                   |

|              |            |           |              |
|--------------|------------|-----------|--------------|
| 1434072_at   | 0.631109   | Smcr7     | NM_001009927 |
| 1439036_a_at | 0.62932425 | Atp1b1    | NM_009721    |
| 1436244_a_at | 0.6259381  | Tle2      | NM_019725    |
| 1448175_at   | 0.625829   | Ehd1      | NM_010119    |
| 1452940_x_at | 0.61396015 | Pitpnc1   | NM_145823    |
| 1451167_at   | 0.613618   | Ccdc101   | NM_029339    |
| 1426835_at   | 0.612829   | Metap1    | NM_175224    |
| 1424019_at   | 0.6007355  | Nop2      | NM_138747    |
| 1424907_a_at | 0.59755975 | Farsa     | NM_025648    |
| 1451152_a_at | 0.592111   | Atp1b1    | NM_009721    |
| 1454680_at   | 0.58880025 | D5Erd579e | NM_001081232 |
| 1415860_at   | 0.588037   | Kpna2     | NM_010655    |
| 1415863_at   | 0.587991   | Eif4g2    | NM_001040131 |

Down-regulated Aging Related Gene List (Log2 scale)

| Probe Set ID | Fold Change | Gene Symbol | RefSeq Transcript ID |
|--------------|-------------|-------------|----------------------|
| 1426065_a_at | -1.6149477  | Trib3       | NM_175093            |
| 1458284_at   | -1.5547405  | Ptbp1       | NM_001077363         |
| 1423693_at   | -1.44138825 | cela1       | NM_033612            |
| 1421075_s_at | -1.34913    | Cyp7b1      | NM_007825            |
| 1424029_at   | -1.32843885 | Tspyl4      | NM_030203            |
| 1420836_at   | -1.194633   | Slc25a30    | NM_026232            |
| 1421074_at   | -1.192674   | Cyp7b1      | NM_007825            |
| 1428651_at   | -1.162781   | Klhl24      | NM_029436            |
| 1440825_s_at | -1.0829895  | Ccdc28a     | NM_144820            |
| 1448839_at   | -1.00542045 | Kank3       | NM_030697            |
| 1431234_at   | -0.94888085 | Itpr1l1     | XM_485065            |
| 1456174_x_at | -0.932915   | Ndr1        | NM_008681            |
| 1438081_at   | -0.9219625  | Mcc         | NM_001085373         |
| 1441124_at   | -0.8633715  | Vezt        | NM_172538            |
| 1416872_at   | -0.83546355 | Tspan6      | NM_019656            |
| 1422701_at   | -0.8343735  | Zap70       | NM_009539            |
| 1428513_at   | -0.826888   | Calcoco1    | NM_026192            |
| 1417811_at   | -0.826539   | Slc24a6     | NM_133221            |
| 1434606_at   | -0.804616   | Erb3        | NM_010153            |
| 1453289_at   | -0.78706485 | Eif2c4      | NM_153177            |
| 1449303_at   | -0.781886   | Sesn3       | NM_030261            |
| 1452973_at   | -0.7702215  | Ppm1k       | NM_175523            |
| 1443017_at   | -0.756989   | Cpeb2       | NM_175937            |
| 1429418_at   | -0.7334115  | Cdc14b      | NM_001122989         |
| 1420723_at   | -0.7328895  | Vnn3        | NM_011979            |
| 1448318_at   | -0.731294   | Afp         | NM_007408            |
| 1449817_at   | -0.721007   | Abcb11      | NM_021022            |

|              |             |         |              |
|--------------|-------------|---------|--------------|
| 1437396_at   | -0.7092305  | Creb3l2 | NM_178661    |
| 1460318_at   | -0.690587   | Csrp3   | NM_013808    |
| 1415992_at   | -0.6797015  | Pigo    | NM_020035    |
| 1452262_at   | -0.677617   | Grpel2  | NM_021296    |
| 1416839_at   | -0.6639235  | Mut     | NM_008650    |
| 1443822_s_at | -0.6624     | Cisd1   | NM_134007    |
| 1435355_at   | -0.6480885  | Neb     | NM_010889    |
| 1419068_at   | -0.62796975 | Rabgef1 | NM_019983    |
| 1436186_at   | -0.61073515 | E2f8    | NM_001013368 |
| 1450408_at   | -0.6092779  | Cln7    | NM_011930    |
| 1421140_a_at | -0.5979305  | Foxp1   | NM_053202    |
| 1427075_s_at | -0.5951355  | Pcmt2   | NM_153594    |
| 1451703_s_at | -0.59381125 | Aprt    | NM_009698    |

## Supplementary Table 2

### Up-regulated SIRT1 Dependent Aging Related Genes in Log2 scale

| Probe Set ID | Fold Change | Gene Symbol | RefSeq Transcript ID |
|--------------|-------------|-------------|----------------------|
| 1417168_a_at | 4.52525115  | Usp2        | NM_016808            |
| 1417602_at   | 3.6385435   | Per2        | NM_011066            |
| 1417904_at   | 1.9767065   | Dclre1a     | NM_018831            |
| 1421653_a_at | 0.9542575   | Igh         |                      |
| 1454680_at   | 0.948635    | D5Ertd579e  | NM_001081232         |
| 1436244_a_at | 0.84533275  | Tle2        | NM_019725            |
| 1421852_at   | 0.811119    | Kcnk5       | NM_021542            |
| 1447724_x_at | 0.7921775   | Opa3        | NM_207525            |
| 1419751_x_at | 0.7685455   | AB056442    | XM_922697            |
| 1418133_at   | 0.765052    | Bcl3        | NM_033601            |
| 1433622_at   | 0.68437525  | Gemin4      | NM_177367            |
| 1428095_a_at | 0.6575575   | C2cd2l      | NM_027909            |
| 1434072_at   | 0.5955415   | Smcr7       | NM_001009927         |
| 1459274_at   | 1.13001015  | Gpr135      | NM_181752            |
| 1450888_at   | 0.8469475   | Napb        | NM_019632            |
| 1438359_at   | 1.005751    | Crtc1       | NM_001004062         |

### Down-regulated SIRT1 Dependent Aging Related Genes in Log2 scale

| Probe Set ID | Fold Change | Gene Symbol | RefSeq Transcript ID |
|--------------|-------------|-------------|----------------------|
| 1421075_s_at | -2.0288475  | Cyp7b1      | NM_007825            |
| 1456174_x_at | -1.78116    | Ndrp1       | NM_008681            |
| 1443017_at   | -1.1646335  | Cpeb2       | NM_175937            |
| 1453289_at   | -1.0622048  | Eif2c4      | NM_153177            |
| 1437396_at   | -0.99196595 | Creb3l2     | NM_178661            |

|              |            |        |              |
|--------------|------------|--------|--------------|
| 1438081_at   | -0.926142  | Mcc    | NM_001085373 |
| 1416872_at   | -0.8191034 | Tspan6 | NM_019656    |
| 1427075_s_at | -0.8154145 | Pcmt2  | NM_153594    |

### Supplementary Table 3

Validation of SIRT1 dependent aging related genes by qRT-PCR

#### Up-regulated genes

|               | 3mon WT     | 12monWT    | 19monWT    | 3mon MT    |
|---------------|-------------|------------|------------|------------|
| per2          | 0.946±0.03  | 3.68±0.05  | 2.485±0.1  | 4.12±0.1   |
| AB056442      | 1.025±0.09  | 2.79±0.14  | 3.37±0.2   | 3.487±0.18 |
| Kcnk5         | 1±0.04      | 2.09±0.14  | 1.91±0.08  | 1.99±0.1   |
| C2cd2l        | 1.012±0.08  | 1.91±0.12  | 2.58±0.07  | 1.633±0.03 |
| Tle2          | 1.014±0.07  | 2.4±0.06   | 1.59±0.07  | 1.96±0.07  |
| Napb          | 1.019±0.08  | 1.81±0.09  | 1.578±0.15 | 2.518±0.18 |
| Gemin4        | 1.0039±0.04 | 1.7±0.03   | 4±0.15     | 2.37±0.04  |
| Smcr7         | 1.026±0.1   | 1.55±0.1   | 4.27±0.17  | 3.12±0.07  |
| 2010003K15Rik | 1.031±0.1   | 2.44±0.02  | 4.797±0.13 | 2.229±0.09 |
| Ctrc1         | 1.019±0.08  | 2.047±0.17 | 2.594±0.8  | 1.86±0.04  |
| Opa3          | 1.294±0.29  | 3.5±0.35   | 2.03±0.16  | 1.62±0.14  |
| D5Ertd579e    | 1.023±0.08  | 3.973±0.07 | 2.384±0.02 | 3.442±0.13 |
| Usp2          | 1.019±0.08  | 4.676±0.57 | 3.72±0.96  | 30.76±5.86 |
| Gpr135        | 1.016±0.077 | 2.709±0.25 | 2.466±0.17 | 1.146±0.05 |

#### Down regulated genes

|         | 3mon WT     | 12mon WT    | 19mon WT   | 3mon MT    |
|---------|-------------|-------------|------------|------------|
| Tspan6  | 1.001±0.02  | 0.833±0.08  | 0.615±0.01 | 0.681±0.03 |
| Cyp7b1  | 1.06±0.14   | 0.686±0.07  | 0.573±0.13 | 0.139±0.06 |
| Pcmt2   | 1.01±0.06   | 0.634±0.03  | 0.454±0.08 | 0.525±0.01 |
| Creb3l2 | 1.016±0.08  | 0.825±0.02  | 0.188±0.05 | 0.619±0.06 |
| Ndr1    | 1.063±0.16  | 0.162±0.04  | 0.098±0.04 | 0.157±0.03 |
| MCC     | 1.031±0.1   | 0.678±0.04  | 0.522±0.07 | 0.435±0.02 |
| Cpeb2   | 1.062±0.105 | 0.533±0.179 | 0.253±0.09 | 0.598±0.05 |
| Eif2c4  | 1.008±0.05  | 0.841±0.01  | 0.536±0.01 | 0.588±0.03 |
| Clock   | 1.018±0.08  | 1.085±0.24  | 0.842±0.23 | 0.431±0.02 |
